# Supplementary material
Source: HighWire-hosted journal article supplement (https://gut.bmj.com/content/67/7/1280)
Supplement: inline-supplementary-material-1 [file inline-supplementary-material-1.pdf]

**SUPPLEMENTARY TABLES:**

**Supplementary Table 1:** Technical success and R0 resection rate in patients with documented difficult resection.

|                                                     | <b>Technical success, n(%)</b> | <b>R0 resection, n(%)</b> |
|-----------------------------------------------------|--------------------------------|---------------------------|
| All procedures (n=181)                              | 162/181 (89.5)                 | 139/181 (76.9)            |
| Procedures with documented difficulties (n=28)      | 19/28 (67.9)                   | 16/28 (57.1)              |
| snare dysfunction (n=13)                            | 8/13 (61.5)                    | 8/13 (61.5)               |
| difficult incorporation of lesion into cap* (n= 15) | 11/15 (73.3)                   | 8/15 (57.1)               |
| Procedures without documented difficulties          | 143/153 (93.4)                 | 125/153 (81.7)            |

\*see also supplementary Table 2

**Supplementary Table 2:** Characteristics of patients with difficult tissue incorporation into the cap. 75% of those patients had prior endoscopic therapy.

| No. | Indication              | Site                    | Size (mm) | Prior therapy | Technical success | R0 Resection |
|-----|-------------------------|-------------------------|-----------|---------------|-------------------|--------------|
| 1   | Non-lifting Adenoma     | Coecum                  | 30        | yes           | no                | no           |
| 2   | Subepithelial tumor     | Sigmoid                 | 20        | no            | no                | no           |
| 3   | Non-lifting Adenoma     | Sigmoid                 | 20        | yes           | no                | no           |
| 4   | T1 carcinoma            | Rectum                  | 10        | yes           | no                | no           |
| 5   | Non-lifting Adenoma     | Transv. Colon           | 20        | yes           | yes               | yes          |
| 6   | Adenoma at diverticulum | Sigmoid                 | 10        | no            | yes               | yes          |
| 7   | Subepithelial tumor     | Coecum                  | 20        | no            | yes               | yes          |
| 8   | Adenoma at appendix     | Coecum                  | 30        | no            | yes               | no           |
| 9   | Non-lifting Adenoma     | Coecum                  | 5         | yes           | yes               | yes          |
| 10  | Non-lifting Adenoma     | Coecum                  | 15        | yes           | yes               | yes          |
| 11  | Subepithelial tumor     | Sigmoid                 | 20        | no            | yes               | yes          |
| 12  | Non-lifting Adenoma     | Descend. Colon          | 20        | yes           | yes               | no           |
| 13  | Non-lifting Adenoma     | Coecum                  | 30        | yes           | yes               | yes          |
| 14  | T1 carcinoma            | Rectosigmoid transition | 10        | yes           | yes               | yes          |
| 15  | Non-lifting Adenoma     | Rectum                  | 15        | yes           | yes               | no           |

**Supplementary Table 3:** Subgroup of difficult adenomas: cases with non-neoplastic final histology after EFTR. Resection was only considered successful if there was no macroscopic and histological evidence of residual lesion at 3-month follow-up. NL-A=Non-lifting adenoma

| ID    | Indication                  | Technical success | 3-mon-F/U          | Explanation                                                                                    |
|-------|-----------------------------|-------------------|--------------------|------------------------------------------------------------------------------------------------|
| LB-01 | Adenoma at diverticulum     | yes               | no residual lesion | Lesion was small at had probably been completely removed by prior extensive biopsy             |
| D-09  | Adenoma at diverticulum     | yes               | no residual lesion | Final histology showed hyperplastic polyp                                                      |
| LB-19 | Adenoma at appendix         | yes               | no residual lesion | Final histology showed hyperplastic polyp                                                      |
| D-18  | Adenoma at appendix         | yes               | no residual lesion | Lesion was small at had probably been completely removed by extensive biopsy                   |
| D-44  | Adenoma at appendix         | yes               | no residual lesion | Final histology showed hyperplastic polyp                                                      |
| E-08  | Adenoma at appendix         | yes               | no residual lesion | Final histology showed hyperplastic polyp                                                      |
| UL-05 | Adenoma at appendix         | no                | residual Adenoma   | Snare dysfunction leading to incomplete / unsuccessful resection                               |
| LB-20 | NL-A, incompletely resected | yes               | no residual lesion | Residual lesion was small at had probably been completely removed by extensive biopsy          |
| LB-29 | NL-A, incompletely resected | yes               | no residual lesion | Residual lesion was small at had probably been completely removed by extensive biopsy          |
| D-27  | NL-A, incompletely resected | yes               | no residual lesion | Residual lesion was small at had probably been completely removed by extensive biopsy          |
| D-15  | NL-A, incompletely resected | no                | lost to F/U        | Difficult incorporation into the cap due to severe scarring resulted in unsuccessful resection |
| FR-15 | NL-A, incompletely resected | no                | lost to F/U        | Difficult incorporation into the cap due to severe scarring resulted in unsuccessful resection |
| D-11  | NL-A, recurrent             | yes               | no residual lesion | Residual lesion was small at had probably been completely removed by extensive biopsy          |
| D-45  | NL-A, recurrent             | yes               | no residual lesion | Residual lesion was small at had probably been completely removed by extensive biopsy          |
| UL-12 | NL-A, recurrent             | yes               | no residual lesion | Residual lesion was small at had probably been completely removed by extensive biopsy          |
| E-18  | NL-A, recurrent             | no                | residual Adenoma   | Difficult incorporation into the cap due to severe scarring resulted in unsuccessful resection |
| UL-03 | NL-A, recurrent             | no                | lost to F/U        | Difficult incorporation into the cap due to severe scarring resulted in unsuccessful resection |
| DO-04 | NL-A, recurrent             | no                | residual Adenoma   | Difficult incorporation into the cap due to severe scarring resulted in unsuccessful resection |

**Supplementary Table 4: Patients with adenocarcinoma**

| <b>Patients with adenocarcinoma</b>                           | <b>All patients (n=29)</b> | <b>Known carcinoma (n=15)</b> | <b>Incidental carcinoma* (n=14)</b> |
|---------------------------------------------------------------|----------------------------|-------------------------------|-------------------------------------|
| <b>R0 Resection, n (%)</b>                                    | <b>21/29 (72.4)</b>        | <b>12/14 (80.0)</b>           | <b>9/14 (64.3)</b>                  |
|                                                               |                            |                               |                                     |
| <b>Rx Resection, n (%)</b>                                    | <b>8/29 (27.6)</b>         | <b>3/15 (20.0)</b>            | <b>5/14 (35.7)</b>                  |
| Rx lateral margin only                                        | 2                          | 1                             | 1                                   |
| Rx basal margin only                                          | 4                          | 1                             | 3                                   |
| Rx lateral and basal margin                                   | 2                          | 0                             | 2                                   |
|                                                               |                            |                               |                                     |
| <b>Resection classified as curative, n (%)</b>                | <b>13/29 (44.8)</b>        | <b>11/15 (73.3%)</b>          | <b>2/14 (14.2%)</b>                 |
|                                                               |                            |                               |                                     |
| <b>Resection classified as incurative, n (%)</b>              | <b>16/29 (55.2)</b>        | <b>4/15 (26.7 %)</b>          | <b>12/14 (85.7%)</b>                |
| Rx, sm invasion < 1000 um                                     | 4                          | 0                             | 4                                   |
| Rx, sm invasion > 1000 um                                     | 4                          | 3                             | 1                                   |
| R0, sm invasion >1000 um                                      | 8                          | 1                             | 7                                   |
|                                                               |                            |                               |                                     |
| <b>Follow up in patients with curative resection, n (%)</b>   |                            |                               |                                     |
| 3 month follow-up available                                   | 11                         | 8                             | 2                                   |
| Recurrency at 3 month follow-up                               | 0                          | 0                             | 0                                   |
|                                                               |                            |                               |                                     |
| <b>Follow up in patients with incurative resection, n (%)</b> |                            |                               |                                     |
| Surgical therapy, endosc. F/U not available                   | 11                         | 4                             | 9                                   |
| No surgical therapy                                           | 5                          | 3                             | 2                                   |
| - Recurrency at 3 or 6 months follow-up**                     | 0                          | 0                             | 0                                   |

\*Patients were initially classified as non-lifting adenomas

\*\* Follow up including biopsy was done in 2 cases after 3 months and in 1 case after 6 months; in one case there was diminutive residual adenoma which was removed with a forceps; there was no residual carcinoma

**Supplementary Table 5: Characteristics of patients with perforation**

| No. | Indication              | Prior treatment | Site                    | Techn. Difficulties | Time of Perforation | Cause of perforation | Further therapy        |
|-----|-------------------------|-----------------|-------------------------|---------------------|---------------------|----------------------|------------------------|
| 1   | T1 carcinoma            | no              | Transverse colon        | no                  | acute               | Clip not released    | Closure with TTS-Clips |
| 2   | Non-lifting adenoma     | yes             | Ascending colon         | no                  | acute               | Clip not released    | Closure with TTS-Clips |
| 3   | Non-lifting adenoma     | no              | Rectosigmoid transition | no                  | acute               | Clip not released    | Closure with OTSC      |
| 4   | Subepithelial tumor     | no              | Upper Rectum            | no                  | acute               | Clip not released    | Closure with TTS-Clips |
| 5   | Adenoma at diverticulum | no              | Sigmoid                 | no                  | acute               | Clip not released    | Surgery                |
| 6   | Non-lifting adenoma     | no              | Ascending colon         | snare dysfunction   | delayed             | Thermal damage       | Surgery                |
